# Supplementary material
Source: HighWire-hosted journal article supplement (https://drc.bmj.com/content/10/2/e002557)
Supplement: inline-supplementary-material-1 [file inline-supplementary-material-1.pdf]

Supplementary Table 1. Sample characteristics of those who completed and did not complete all cognitive tests.

|                                                |                                 | Overall<br>(N=1,213) | Excluded<br>(n=93) |
|------------------------------------------------|---------------------------------|----------------------|--------------------|
| <b>Demographics</b>                            |                                 |                      |                    |
| Age (years) Mean (SD)                          |                                 | 67.79 (6.60)         | 70.40 (7.18)       |
| Female, n (%)                                  |                                 | 621 (51.20)          | 34 (48.57)         |
| Race/ethnicity, n (%)                          |                                 |                      |                    |
|                                                | White                           | 1026 (84.58)         | 60 (85.71)         |
|                                                | Hispanic                        | 21 (1.73)            | 5 (7.14)           |
|                                                | Asian                           | 21 (1.73)            | 1 (1.43)           |
|                                                | African American                | 97 (8.00)            | 1 (1.43)           |
|                                                | Other                           | 44 (3.63)            | 2 (2.86)           |
|                                                | Unknown                         | 4 (0.33)             | 1 (1.43)           |
| Highest level of educational attainment, n (%) |                                 |                      |                    |
|                                                | Some college or less            | 473 (38.99)          | 31 (44.29)         |
|                                                | Bachelor's degree               | 371 (30.59)          | 18 (25.71)         |
|                                                | Graduate or professional degree | 365 (30.09)          | 19 (27.14)         |
| Diabetes                                       |                                 |                      |                    |
|                                                | T1D                             | 734 (60.51)          | 43 (61.43)         |
|                                                | T2D                             | 232 (19.13)          | 16 (22.86)         |
|                                                | No diabetes                     | 247 (20.36)          | 11 (15.71)         |
| Geriatric Depression Scale, mean (SD)          |                                 | 29.08 (6.33)         | 3.52 (3.73)        |
| Pittsburg Sleep Quality Index, mean (SD)       |                                 | 1.99 (2.27)          | 8.59 (3.15)        |
| Stroke, n (%)                                  |                                 | 8.02 (2.72)          | 11 (15.71)         |
| Myocardial Infarction, n (%)                   |                                 | 99 (80.06)           | 10 (14.29)         |
| Retinopathy, n (%)                             |                                 | 122 (10.06)          | 23 (32.86)         |
| Nephropathy, n (%)                             |                                 | 56 (4.62)            | 7 (10.00)          |
| Neuropathy, n (%)                              |                                 | 333 (27.45)          | 30 (42.86)         |
| Age at diabetes diagnosis, mean (SD)           |                                 | 34.68 (18.49)        | 30.90 (16.83)      |
| Diabetes duration in years, mean (SD)          |                                 | 32.93 (17.85)        | 38.81 (16.73)      |
| Severe hypoglycemia, n (%)*                    |                                 | 246 (25.47)          | 18 (25.71)         |
| Diabetic ketoacidosis, n (%)**                 |                                 | 207 (21.43)          | 16 (22.86)         |
